# Supplementary material
Source: HighWire-hosted journal article supplement (https://sit.bmj.com/highwire/filestream/524/field_highwire_adjunct_files/0/bmjsit-2021-000120supp001_data_supplement.pdf)
Supplement: bmjsit-2021-000120supp001_data_supplement.pdf [file bmjsit-2021-000120supp001_data_supplement.pdf]

## Appendix 1: search strategy

### SURGICAL PROCEDURES

1. 2015/01/01:2019/12/31 [dp]
2. "Random Allocation"[Mesh] OR "Clinical Trials as Topic"[Mesh] OR "Randomized controlled trial"[pt] OR "Controlled clinical trial"[pt] OR "Randomized"[tiab] OR "Randomization"[tiab] OR "Randomly"[tiab] OR "Placebo"[tiab] OR "Trials"[ti]
3. Combine: #1 AND #2
4. "Specialties, Surgical"[Mesh] OR "Surgical Procedures, Operative"[Mesh] OR "Surgery" [sh]
5. "Surgery"[tiab] OR "Surgeries"[tiab] OR "Surgerys"[tiab] OR "Operation"[tiab] OR "Operations"[tiab] OR "Surgical"[tw] OR "Surgicals"[tiab] OR "Procedure"[tiab] OR "Procedures"[tiab] OR "Surgical procedure\*"[tiab] OR "Surgical operation\*"[tiab] OR "Surgical treatment\*"[tiab] OR "Surgical therap\*"[tiab] OR "Surgical intervention\*"[tiab] OR "Surgical research\*"[tiab]
6. "Operative procedure\*"[tiab] OR "Operative operation\*"[tiab] OR "Operative treatment\*"[tiab] OR "Operative therap\*"[tiab] OR "Operative intervention\*"[tiab] OR "Operative research\*"[tiab] "Invasive procedure\*"[tiab] OR "Invasive intervention\*"[tiab]
7. "Peroperative procedure\*"[tiab] OR "Peroperative intervention\*"[tiab] OR "Perioperative procedure\*"[tiab] OR "Perioperative intervention\*"[tiab] OR "Preoperative procedure\*"[tiab] OR "Preoperative intervention\*"[tiab] OR "Intraoperative procedure\*"[tiab] OR "Intraoperative intervention\*"[tiab]
8. Combine: #4 OR #5 OR #6 OR #7
9. Combine: #3 AND #8
10. "Drug therapy"[MeSH] OR "Pharmaceutical Preparations"[Mesh] OR "Drug therap\*"[tiab] OR "Drug treatment"[tiab] OR "chemotherap\*"[tiab] OR "Pharmacotherap\*"[tiab] OR "Pharmacologic"[tiab]
11. Combine #9 NOT #10
12. "Review Literature as Topic"[Mesh] OR "Meta-Analysis as Topic"[Mesh] OR "Meta-Analysis" [pt] OR "Meta-analy\*"[tiab] OR "Meta analy\*"[tiab] OR "Metaanaly\*"[tiab] OR "Systematic review\*"[tiab] OR "Systematic literature review"[tiab] OR "Integrative review"[tiab] OR "Rapid review"[tiab] OR "Cochrane database syst rev"[tiab] OR "Practice guideline"[pt] OR "Consensus development conference"[pt] OR "Congress"[pt] OR "Comment"[pt] OR "Letter"[pt] OR "Case report\*"[pt] OR "Observational study"[pt] OR "Interview"[pt] OR "Review"[pt] OR "Clinical trial protocol"[pt] OR "Single-case studies as topic"[MeSH] "Case series"[tiab] OR "Cohort study"[tiab] OR "Case control study"[tiab]
13. Combine #11 NOT 12
14. "Animals"[MeSH Terms] NOT "humans"[MeSH Terms]
15. Combine #13 NOT 14

**SURGICAL DEVICES**

1. 2015/01/01:2019/12/31 [dp]
2. "Random Allocation"[Mesh] OR "Clinical Trials as Topic"[Mesh] OR "Randomized controlled trial"[pt] OR "Controlled clinical trial"[pt] OR "Randomized"[tiab] OR "Randomization"[tiab] OR "Randomly"[tiab] OR "Placebo"[tiab] OR "Trials"[ti]
3. Combine: #1 AND #2
4. "Equipment and Supplies/surgery"[Mesh] OR "Equipment and Supplies/therapeutic use"[Mesh] OR "Equipment and Supplies/therapy"[Mesh] OR "Equipment design"[MeSH Terms] OR "Surgical equipment\*"[tiab] OR "Surgical suppl\*"[tiab] OR "Surgical apparatus\*"[tiab] OR "Surgical instrument\*"[tiab] OR "Surgical device\*"[tiab] OR "Implantable"[tiab] OR "Implantable device\*"[tiab]
5. Combine: #3 AND #4
6. "Drug therapy"[MeSH] OR "Pharmaceutical Preparations"[Mesh] OR "Drug therap\*"[tiab] OR "Drug treatment"[tiab] OR "chemotherap\*"[tiab] OR "Pharmacotherap\*"[tiab] OR "Pharmacologic"[tiab]
7. Combine #5 NOT #6
8. "Review Literature as Topic"[Mesh] OR "Meta-Analysis as Topic"[Mesh] OR "Meta-Analysis" [pt] OR "Meta-analy\*"[tiab] OR "Meta analy\*"[tiab] OR "Metaanaly\*"[tiab] OR "Systematic review\*"[tiab] OR "Systematic literature review"[tiab] OR "Integrative review"[tiab] OR "Rapid review"[tiab] OR "Cochrane database syst rev"[tiab] OR "Practice guideline"[pt] OR "Consensus development conference"[pt] OR "Congress"[pt] OR "Comment"[pt] OR "Letter"[pt] OR "Case report\*"[pt] OR "Observational study"[pt] OR "Interview"[pt] OR "Review"[pt] OR "Clinical trial protocol"[pt] OR "Single-case studies as topic"[MeSH] "Case series"[tiab] OR "Cohort study"[tiab] OR "Case control study"[tiab]
9. Combine #7 NOT #8
10. "Animals"[MeSH Terms] NOT "humans"[MeSH Terms]
11. Combine #9 NOT 10
